# Supplementary material for: Historic Horse Family Displaying Malformations of the Cervicothoracic Junction and Their Connection to Modern German Warmblood Horses
Source: MDPI journal article supplement (doi:10.3390/ani13213415), 2023-11-03
Supplement: s1 [file s1]

**Table S1.** Information on the examined skeletons.

| <b>Name</b>    | <b>Breed</b> | <b>Birth year</b> | <b>Age of death in years</b> |
|----------------|--------------|-------------------|------------------------------|
| Dux            | Warmblood    | 1948              | -                            |
| Der Loewe XX   | Thoroughbred | 1944              | 29                           |
| Birkhahn XX    | Thoroughbred | 1945              | 20                           |
| Dark Ronald XX | Thoroughbred | 1905              | 23                           |
| Le Destrier XX | Thoroughbred | 1877              | 28                           |

**Table S2.** Malformations of the cervicothoracic junction exhibited by the historic skeletons.

| <b>Skeleton</b> | <b>CVT C6</b> |      | <b>CrVT C6</b> |      | <b>TVL C7</b> |      | <b>AF C7</b> |       | <b>Spin. proc. C7</b> | <b>Spin. proc. T1</b> |
|-----------------|---------------|------|----------------|------|---------------|------|--------------|-------|-----------------------|-----------------------|
|                 | right         | left | right          | left | right         | left | right        | left  |                       |                       |
| Dux             | -             | -    | -              | -    | -             | -    | -            | -     | -                     | type 2                |
| Le Destrier XX  | -             | -    | -              | -    | -             | -    | -            | -     | type 1b               | type 1                |
| Der Loewe XX    | -             | 4/4  | -              | -    | -             | -    | -            | small | -                     | type 2                |
| Birkhahn XX     | 4/4           | 4/4  | -              | 1/4  | x             | x    | large        | large | type 3                | type 2                |
| Dark Ronald XX  | 4/4           | -    | 1/4            | -    | x             | -    | medium       | -     | -                     | type 2                |
